# Supplementary material for: Surface in situ modulation of carbon nanotube-supported Fe–Ni compounds via electrochemical reduction to enhance the catalytic performance for the oxygen evolution reaction
Source: Royal Society of Chemistry journal article supplement (doi:10.1039/d4qi01046a), 2024-01-01
Supplement: d4qi01046a1.pdf [file d4qi01046a1.pdf]

## Supporting information

### **Surface in-situ modulation for carbon nanotube-supported Fe-Ni compounds via electrochemical reduction to enhance the catalytic performance for oxygen evolution reaction**

Taotao Gao<sup>a</sup>, Qi An<sup>a</sup>, Yang Zhang<sup>a</sup>, Qu Yue<sup>a</sup>, Chongbo Liu<sup>a</sup>, Xiaoqin Li<sup>a</sup>,  
Bing Li<sup>b</sup>, Lu Qiu<sup>a,c\*</sup>, Dan Xiao<sup>a,c\*</sup>, Qian Zhao<sup>a\*</sup>

*a Institute for Advanced Study, School of Mechanical Engineering, Chengdu University, Chengdu, 610106, P. R. China.*

*E-mail: xiaodan@scu.edu.cn, qiulu@cdu.edu.cn, and zhao\_qian@cdu.edu.cn*

*b Hubei Key Laboratory of Wudang Local Chinese Medicine Research, Hubei University of Medicine, Shiyan, 442000, P. R. China.*

*c College of Chemical Engineering, Sichuan University, Chengdu, 610065, P. R. China*

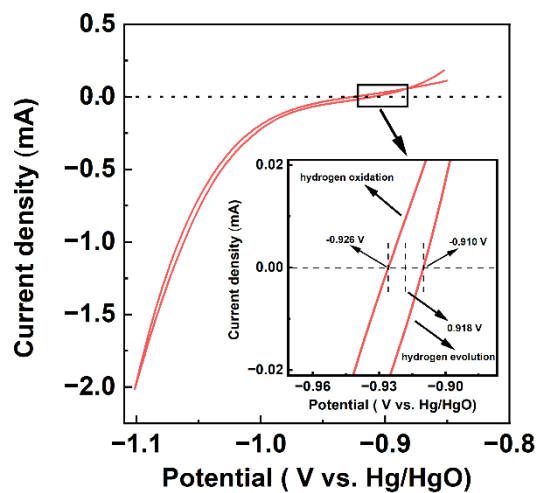

**Fig. S1** RHE calibration of Hg/HgO reference electrode.

The correction curve for the Hg/HgO reference electrode is shown in Fig. S1. The calibration is carried out in the 1 M KOH electrolyte with a Pt plate and a carbon rod as the working electrode and counter electrode, respectively. Cyclic voltammetry is conducted at a scan rate of  $10 \text{ mV s}^{-1}$ , and the average of the two potentials at which the current crossed zero is taken as the thermodynamic potential for the reversible hydrogen electrode.<sup>1</sup> In this work, the calibration value is 0.918 V. RHE (Fig. S1, inset).

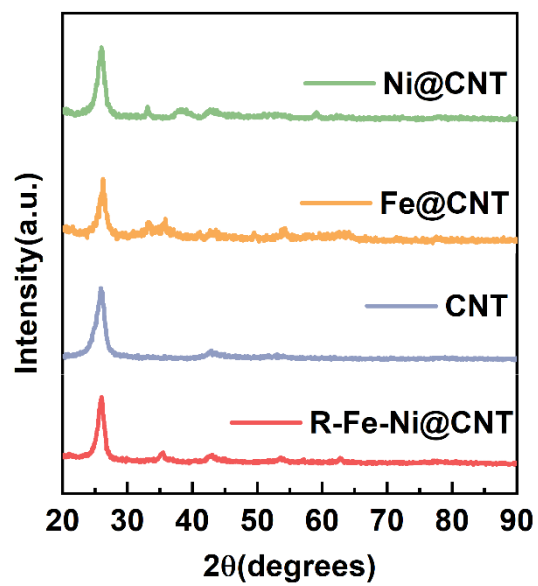

Fig. S2. XRD patterns of the samples.

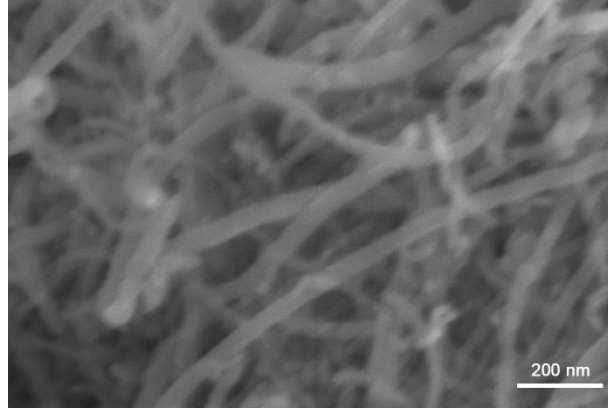

**Fig. S3.** SEM image of CNT.

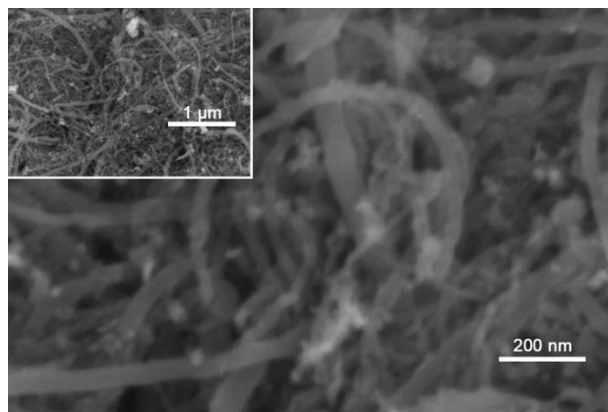

**Fig. S4.** SEM images of Fe@CNT.

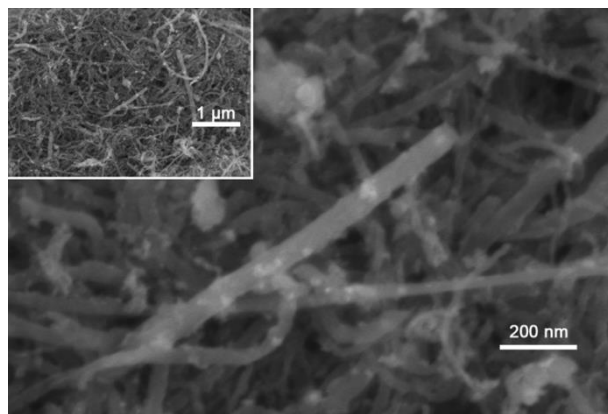

**Fig. S5.** SEM images of Ni@CNT.

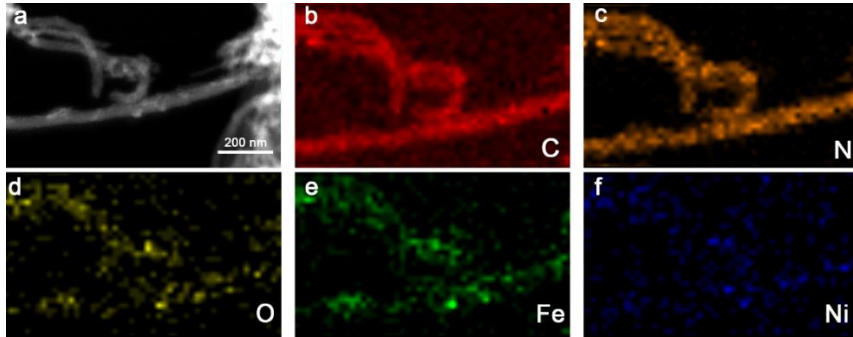

**Fig. S6.** The TEM mapping images of Fe-Ni@CNT.

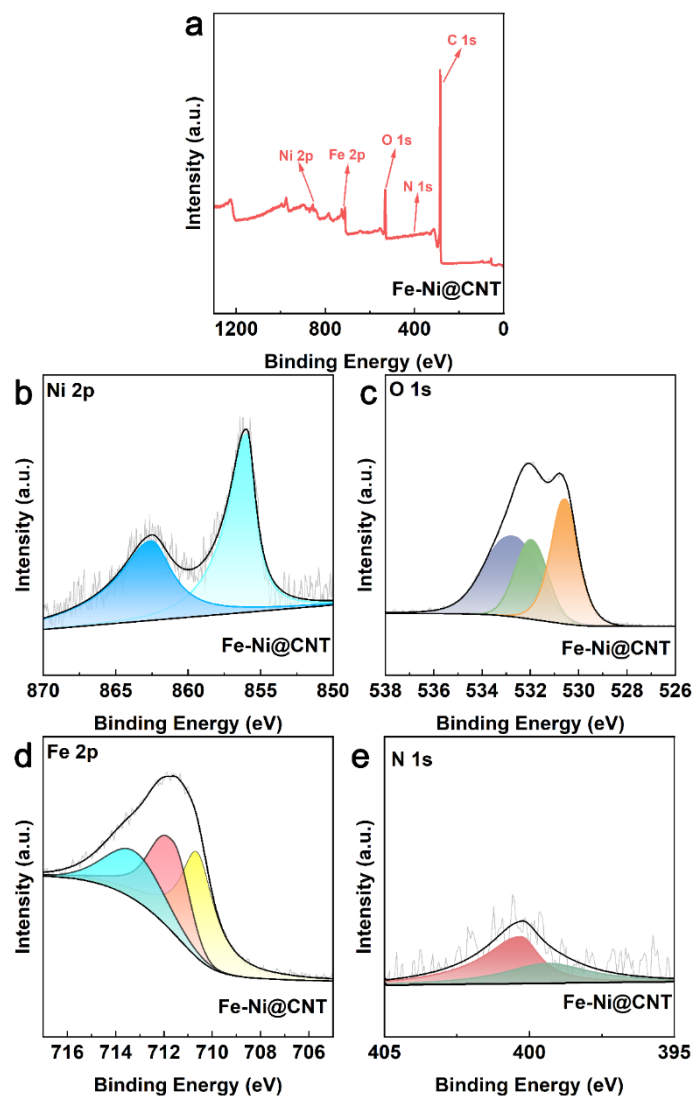

**Fig. S7.** XPS spectra of the Fe-Ni@CNT.



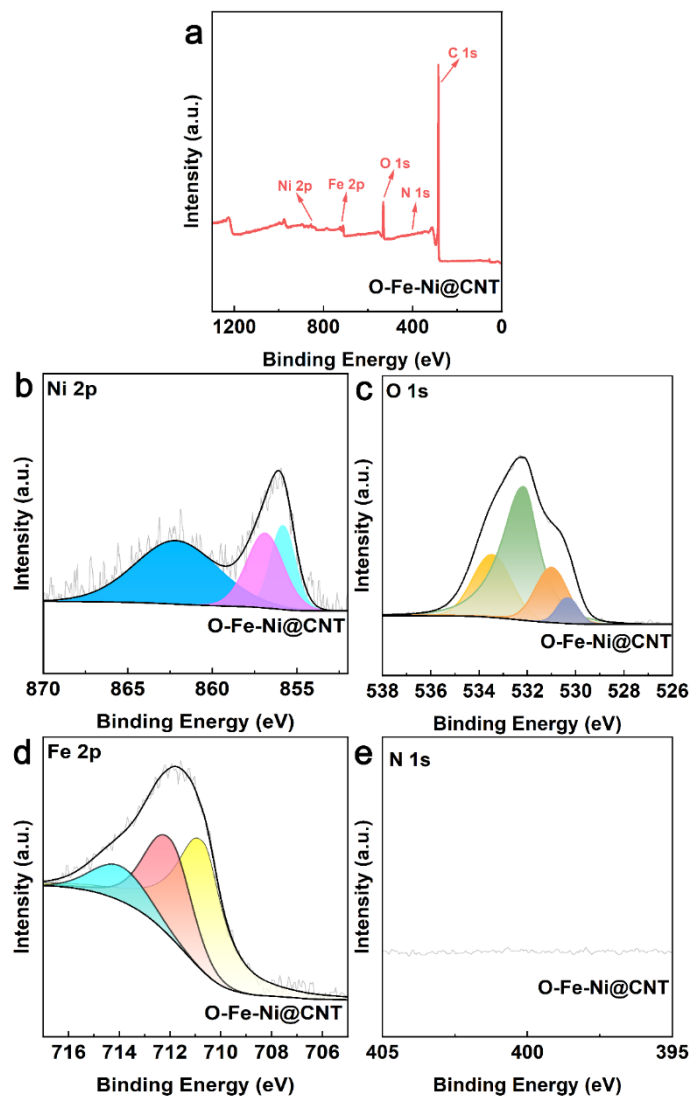

**Fig. S8.** XPS spectra of the O-Fe-Ni@CNT.

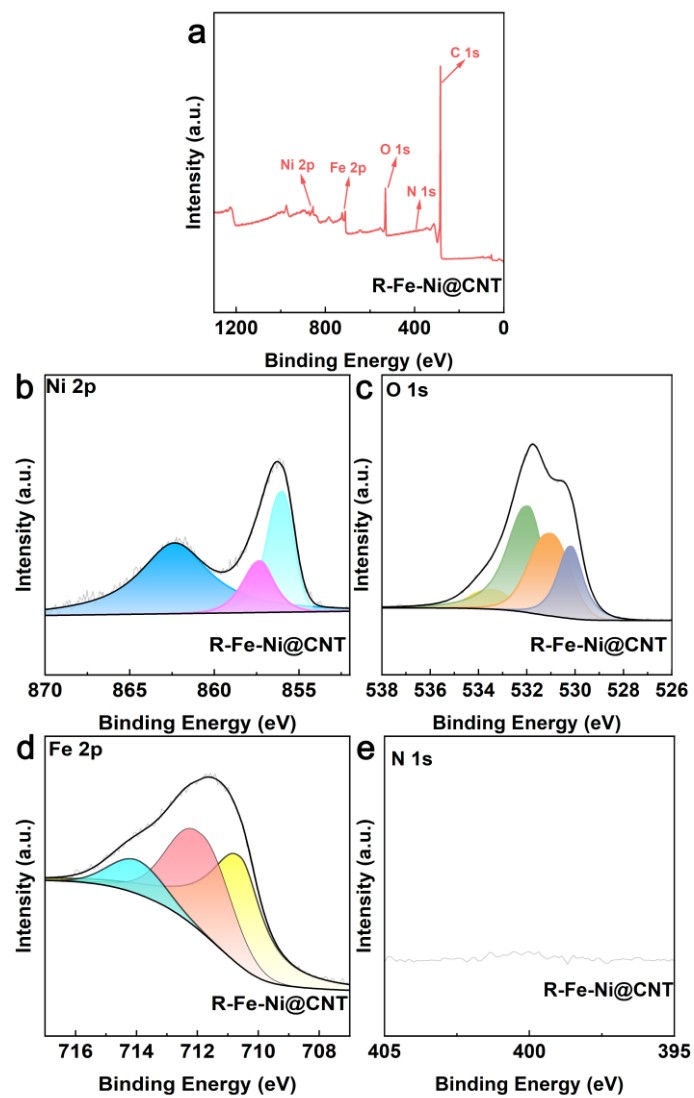

**Fig. S9.** XPS spectra of the R-Fe-Ni@CNT

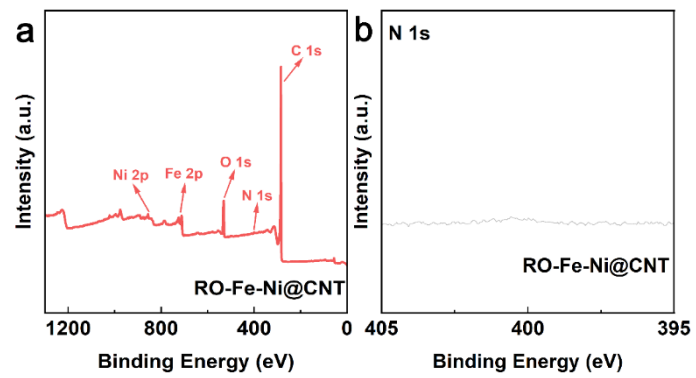

**Fig. S10.** XPS spectra of the RO-Fe-Ni@CNT.

**Table S1.** According to the XPS spectra, the proportion of O with different chemical environments in the samples.

| O Chemical environment | O%    |       |       |       |
|------------------------|-------|-------|-------|-------|
|                        | Water | C-O   | M-OOH | M-O   |
| Fe-Ni@CNT              | 36.35 | 38.85 | 0     | 24.8  |
| O-Fe-Ni@CNT            | 22.63 | 54.60 | 17.73 | 5.04  |
| R-Fe-Ni@CNT            | 14.55 | 35.49 | 22.54 | 27.42 |
| RO-Fe-Ni@CNT           | 17.69 | 28.58 | 37.13 | 16.6  |

**Table S2.** According to the XPS spectra, the proportion of Ni with different chemical environments in the samples.

| Chemical environment                      | Ni%    |        |
|-------------------------------------------|--------|--------|
|                                           | Ni(2+) | Ni(3+) |
| Ni@CNT                                    | 100    | 0      |
| Fe-Ni@CNT                                 | 100    | 0      |
| O-Fe-Ni@CNT                               | 41.20  | 58.80  |
| R-Fe-Ni@CNT                               | 66.49  | 33.51  |
| RO-Fe-Ni@CNT                              | 30.55  | 69.45  |
| O-Fe-Ni@CNT<br>(After stability testing)  | 44.55  | 55.45  |
| RO-Fe-Ni@CNT<br>(After stability testing) | 31.97  | 68.03  |

**Table S3.** Fe and Ni contents were measured by ICP-OES.

| Catalysts    | Fe     | Ni    |
|--------------|--------|-------|
| Fe@CNT       | 27.47% | -     |
| Ni@CNT       | -      | 7.56% |
| Fe-Ni@CNT    | 15.18% | 3.68% |
| O-Fe-Ni@CNT  | 13.28% | 3.01% |
| R-Fe-Ni@CNT  | 14.97% | 3.54% |
| RO-Fe-Ni@CNT | 14.41% | 3.35% |

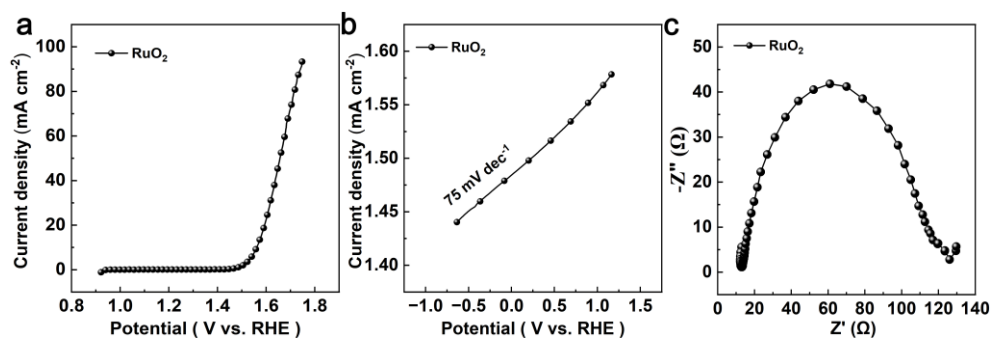

**Fig. S11.** (a) Polarization curve, (b) Tafel curve, and (c) the electrochemical impedance spectroscopy of RuO<sub>2</sub>.

**Table S4.** Comparison of the OER catalytic activity in 1 M KOH.

| Catalysts                                                                              | Collector                  | Tafel slope<br>(mV dec <sup>-1</sup> ) | Overpotential (mV) at different current density (mA cm <sup>-2</sup> ) |      |      | References |
|----------------------------------------------------------------------------------------|----------------------------|----------------------------------------|------------------------------------------------------------------------|------|------|------------|
|                                                                                        |                            |                                        | 10                                                                     | 100  | 200  |            |
| Ni <sub>2</sub> Fe(O)OH/IF                                                             | Iron foam                  | 51.16                                  | -                                                                      | 245  | -    | 2          |
| NiCoFe <sub>x</sub> P/CC                                                               | Carbon cloth               | 56                                     | -                                                                      | ~280 | ~340 | 3          |
| 0.6 wt%-Fe <sub>2</sub> O <sub>3</sub> @Ni<br>MOF-74                                   | Carbon paper               | 64                                     | 264                                                                    | ~310 | ~330 | 4          |
| Ni-Fe LDH hollow<br>prisms                                                             | Glassy carbon<br>electrode | 49.4                                   | 280                                                                    | ~330 | -    | 5          |
| Fe/Ni NWs/NF                                                                           | Nickel foam                | 55.8                                   | -                                                                      | 318  | ~330 | 6          |
| FeNi-MOF                                                                               | Rotary disk<br>electrode   | 49                                     | -                                                                      | 287  | ~310 | 7          |
| FeNi <sub>1.34</sub> @FeNi-foil                                                        | FeNi-foil                  | 53                                     | 283                                                                    | -    | -    | 8          |
| Ni/NiFe <sub>2</sub> O <sub>4</sub> -CNTsHMS                                           | Rotating disk<br>electrode | 46.03                                  | 311                                                                    | -    | -    | 9          |
| FeNi <sub>2</sub> S <sub>4</sub> NPs/CB                                                | Rotating disk<br>electrode | 68                                     | 290                                                                    | -    | -    | 10         |
| NiCd(A)Fe                                                                              | Rotating disk<br>electrode | 38                                     | 290                                                                    | -    | -    | 11         |
| Mn <sub>0.1</sub> Fe <sub>0.1</sub> Ni <sub>0.3</sub> Co <sub>2.5</sub> O <sub>4</sub> | Glassy carbon<br>electrode | -                                      | 362                                                                    | ~410 | ~450 | 12         |
| NiFeO <sub>x</sub> (OH) <sub>y</sub> @NCA                                              | Glassy carbon<br>electrode | 72                                     | 304                                                                    | -    | -    | 13         |
| RO-Fe-Ni@CNT                                                                           | Glassy carbon<br>electrode | 48                                     | 263                                                                    | 316  | 343  | This work  |
| O-Fe-Ni@CNT                                                                            | Glassy carbon<br>electrode | 67                                     | 336                                                                    | -    | -    | This work  |



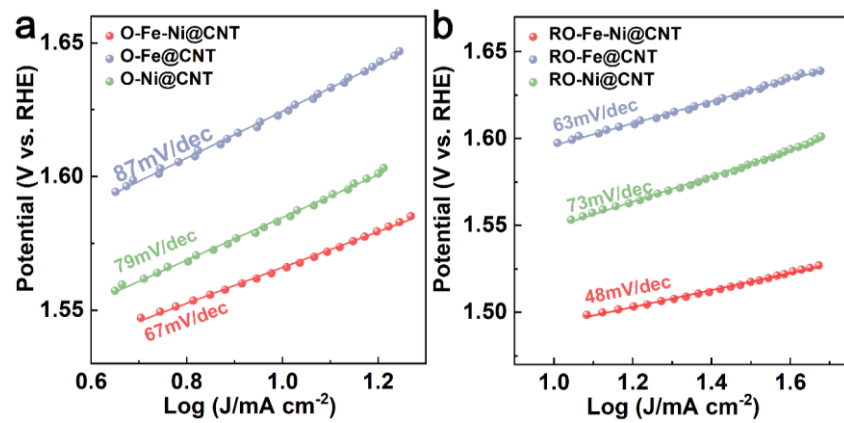

**Fig. S12.** Tafel curves of (a) O-Fe-Ni@CNT, O-Fe@CNT, O-Ni@CNT and (b) RO-Fe-Ni@CNT, RO-Fe@CNT and RO-Ni@CNT.

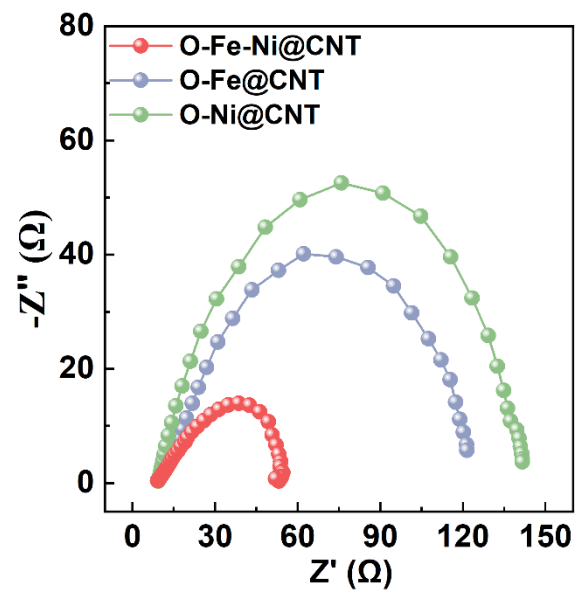

**Fig. S13.** Electrochemical impedance spectroscopy of O-Fe-Ni@CNT, O-Fe@CNT, and O-Ni@CNT.

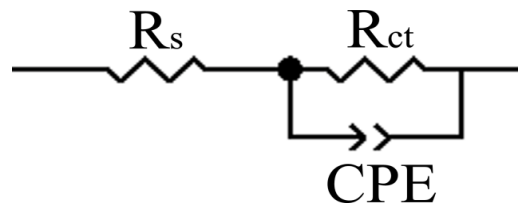

**Fig. S14.** The equivalent circuit model used to fit Nyquist plots.

**Table S5.** Charge transfer resistance ( $R_{ct}$ ) and solution resistance ( $R_s$ ) of the samples.

| Catalysts        | $R_{ct}$ ( $\Omega$ ) | $R_s$ ( $\Omega$ ) |
|------------------|-----------------------|--------------------|
| O-Fe-Ni@CNT      | 54.7                  | 9.2                |
| RO-Fe-Ni@CNT     | 9.3                   | 8.6                |
| O-Ni@CNT         | 132.0                 | 8.9                |
| RO-Ni@CNT        | 62.6                  | 8.2                |
| O-Fe@CNT         | 116.0                 | 9.1                |
| RO-Fe@CNT        | 49.0                  | 8.7                |
| RuO <sub>2</sub> | 103.0                 | 9.6                |

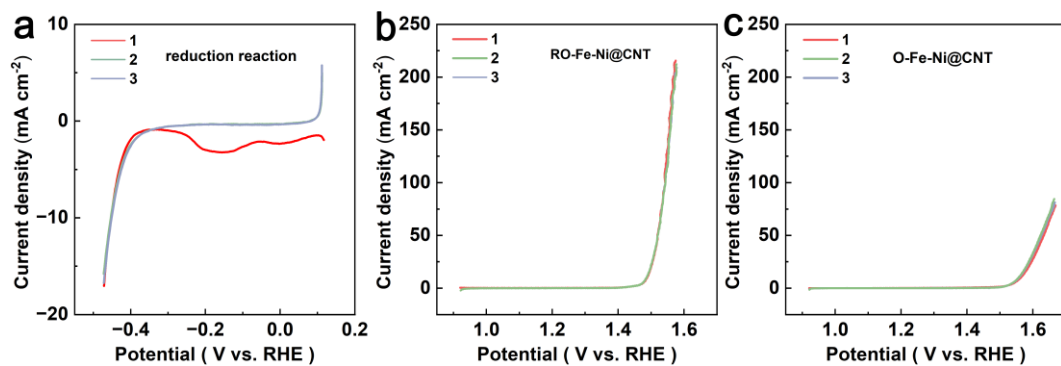

**Fig. S15.** Linear sweep voltammetry curves of a) the reduction process of Fe-Ni@CNT to prepare the R-Fe-Ni@CNT, b) the oxidation process of R-Fe-Ni@CNT to obtain the RO-Fe-Ni@CNT, and c) the oxidation process of Fe-Ni@CNT to obtain the O-Fe-Ni@CNT, respectively.

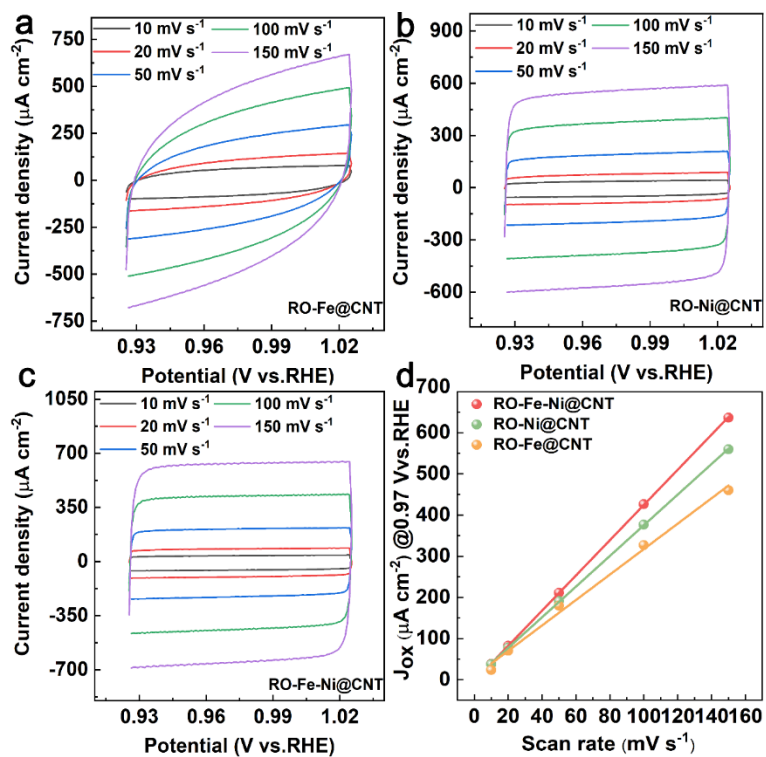

**Fig. S16.** CV curves of (a) RO-Fe@CNT; (b) RO-Ni@CNT; (c) RO-Fe-Ni@CNT; and (d) linear fitting plots used for evaluating the  $C_{\text{dl}}$  against the scan rate at 0.97 V vs. RHE.

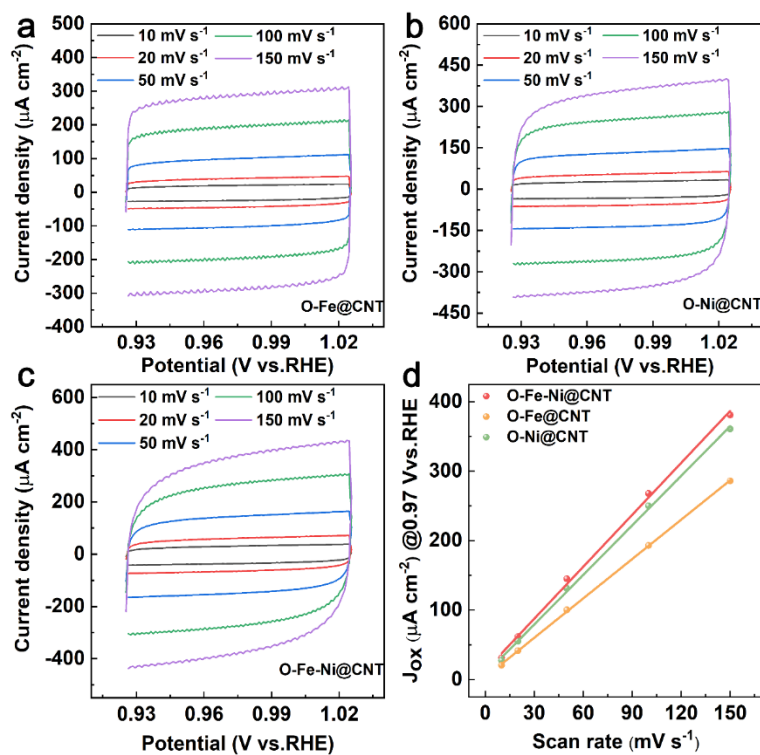

**Fig. S17.** CV curves of (a) O-Fe @CNT; (b) O- Ni@CNT; (c) O-Fe-Ni@CNT; and (d) linear fitting plots used for evaluating the  $C_{dl}$  against the scan rate at 0.97 V vs. RHE.

The electrochemical active surface area of the catalysts was determined through measurements of electrical double-layer capacitance.<sup>14-16</sup> According to Fig. S16d and S17d, the electrical double-layer capacitance could be obtained. Then the electrochemical active surface area could be obtained based on the specific capacitance value of a smooth standard with a real surface area of 1 cm<sup>2</sup>.<sup>17</sup> Based on previous studies, 40 μF cm<sup>-2</sup> is considered the value of specific capacitance for a smooth standard with a real surface area of 1 cm<sup>2</sup>.

The electrochemical active surface area could be obtained via the following equation:

$$A_{\text{ECSA}} = \frac{\text{The electrical double-layer capacitor}}{40}$$

For example:

$$\text{Fe-Ni@CNT: } A_{\text{ECSA}} = \frac{4270}{40} = 106.75 \text{ cm}^2_{\text{ECSA}}$$

**Table S6.** Calculated electrochemical active surface area (ECSA) of the obtained samples.

| Catalysts     | Specific Capacitance<br>(μF cm <sup>-2</sup> ) | ECSA<br>(cm <sup>2</sup> <sub>ECSA</sub> ) |
|---------------|------------------------------------------------|--------------------------------------------|
| O-Ni-Fe@CNTs  | 2280                                           | 57.00                                      |
| RO-Fe-Ni@CNTs | 4270                                           | 106.75                                     |
| O-Ni@CNTs     | 2370                                           | 59.25                                      |
| RO-Ni@CNTs    | 3720                                           | 93.00                                      |
| O-Fe@CNTs     | 1890                                           | 47.25                                      |
| RO-Fe@CNTs    | 3090                                           | 77.25                                      |



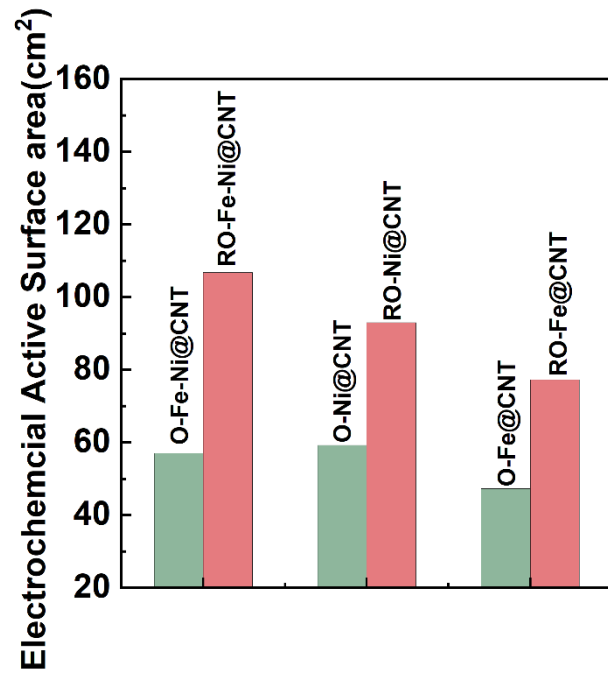

Fig. S18. The bar chart of ECSA for the samples.

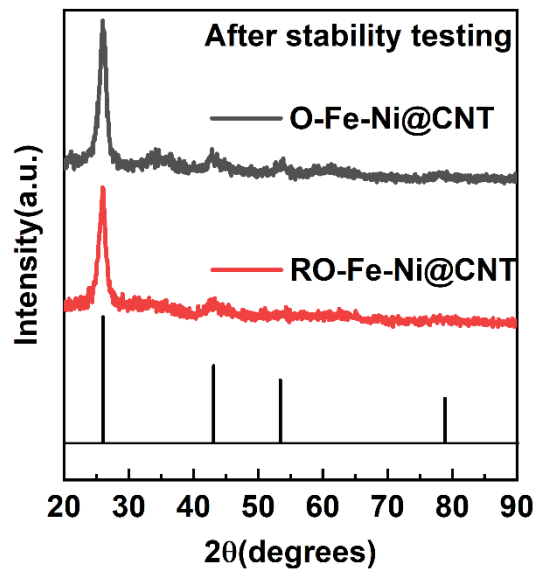

**Fig. S19.** XRD patterns of the O-Fe-Ni@CNT and RO-Fe-Ni@CNT after the stability testing.

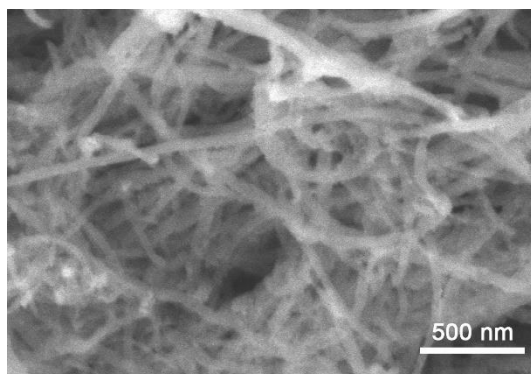

**Fig. S20.** SEM image of the O-Fe-Ni@CNT after the stability testing.

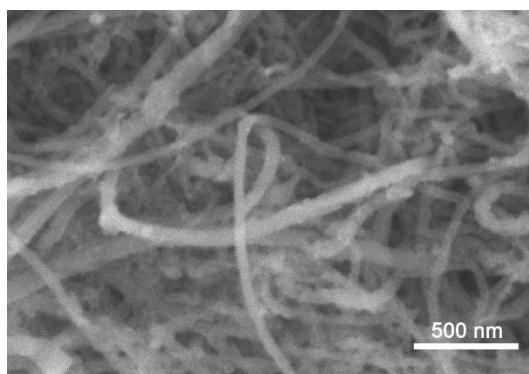

**Fig. S21.** SEM image of the RO-Fe-Ni@CNT after the stability testing.

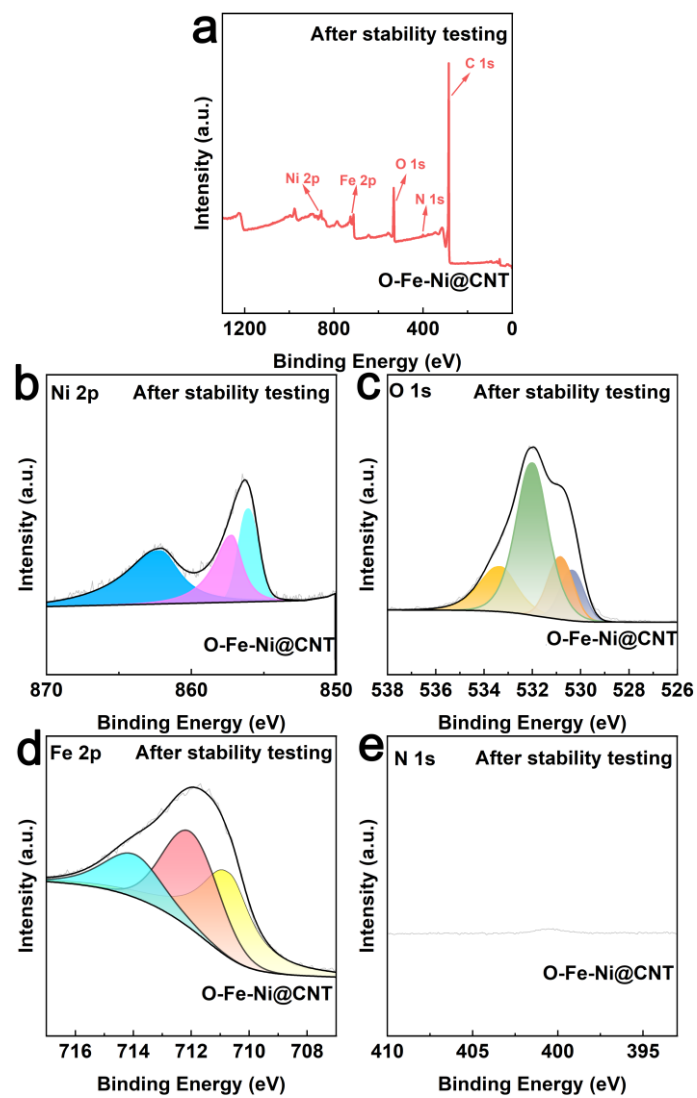

**Fig. S22.** XPS spectra of the O-Fe-Ni@CNT after the stability testing.

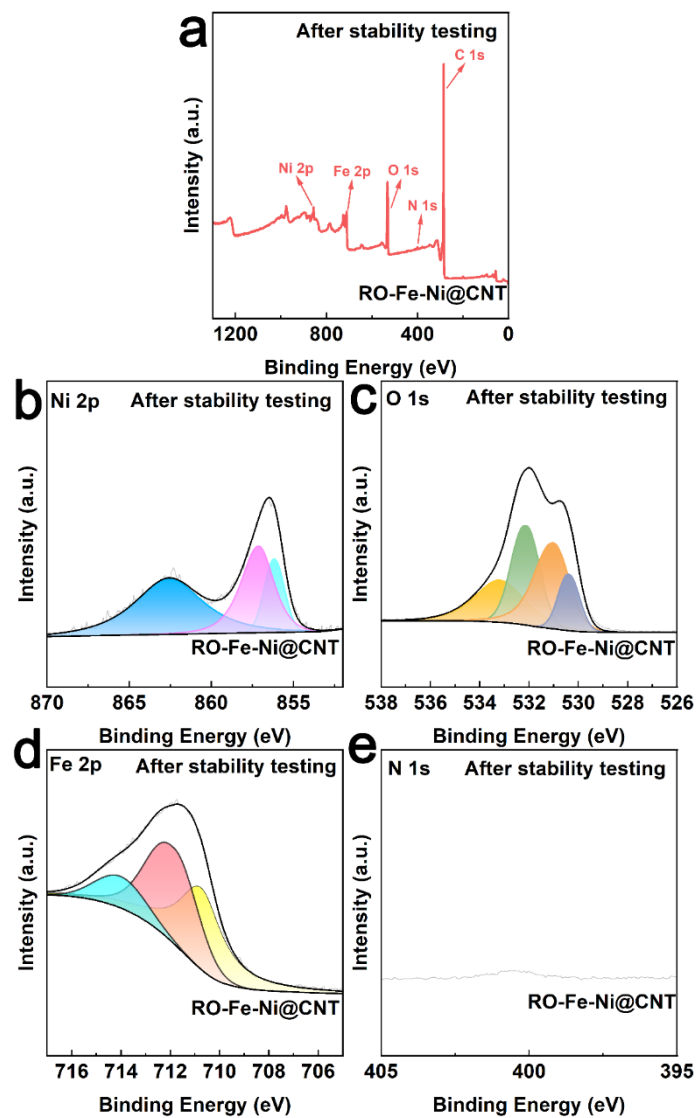

**Fig. S23.** XPS spectra of the RO-Fe-Ni@CNT after the stability testing.

## References

- 1 B. Ma, Z. Yang, Y. Chen and Z. Yuan, Nickel Cobalt Phosphide with Three-Dimensional Nanostructure as a Highly Efficient Electrocatalyst for Hydrogen Evolution Reaction in Both Acidic and Alkaline Electrolytes. *Nano Res.*, 2019, **12**, 375-380.
- 2 R. Y. Fan, H. Y. Zhao, Z. Y. Zhao, W. H. Hu, X. Liu, J. F. Yu, H. Hu, Y. M. Chai and B. Dong, Effective Regulation Mechanisms of Fe-Ni(Oxy)Hydroxide: Ni-Rich Heteroatomic Bonding (Ni-O-Fe-O-Ni) Is Essential. *Nano Res.*, 2023, **16**, 12026-12034.
- 3 C. Ray, S. C. Lee, B. Jin, A. Kundu, J. H. Park and S. C. Jun, Stacked Porous Iron-Doped Nickel Cobalt Phosphide Nanoparticle: An Efficient and Stable Water Splitting Electrocatalyst. *ACS Sustainable Chem. Eng.*, 2018, **6**, 6146-6156.
- 4 Z. Gao, Z. W. Yu, F. Q. Liu, Y. Yu, X. M. Su, L. Wang, Z. Z. Xu, Y. L. Yang, G. R. Wu, X. F. Feng and F. Luo, Ultralow-Content Iron-Decorated Ni-MOF-74 Fabricated by a Metal-Organic Framework Surface Reaction for Efficient Electrocatalytic Water Oxidation. *Inorg. Chem.*, 2019, **58**, 11500-11507.
- 5 L. Yu, J. F. Yang, B. Y. Guan, Y. Lu and X. W. (David) Lou, Hierarchical Hollow Nanoprisms Based on Ultrathin Ni-Fe Layered Double Hydroxide Nanosheets with Enhanced Electrocatalytic Activity towards Oxygen Evolution. *Angew. Chem. Int. Ed.*, 2018, **57**, 172.
- 6 G. Zhou, D. Gao, Y. Dong, L. Wang, H. Wang, X. Wang, V. Linkov and R. Wang, Three-Dimensional Nickel Nanowires Modified by Amorphous Fe Nanosheets as Electrocatalysts for the Oxygen Evolution Reaction. *Dalton Trans.*, 2023, **52**, 5680-5686.
- 7 F. Zheng, D. Xiang, P. Li, Z. Zhang, C. Du, Z. Zhuang, X. Li and W. Chen, Highly Conductive Bimetallic Ni-Fe Metal Organic Framework as a Novel Electrocatalyst for Water Oxidation. *ACS Sustain. Chem. Eng.*, 2019, **7**, 9743-9749.
- 8 U. Y. Qazi, C. Z. Yuan, N. Ullah, Y. F. Jiang, M. Imran, A. Zeb, S. J. Zhao, R. Javaid and A. W. Xu, One-Step Growth of Iron-Nickel Bimetallic Nanoparticles on FeNi Alloy Foils: Highly Efficient Advanced Electrodes for the Oxygen Evolution Reaction. *ACS Appl. Mater. Interfaces*, 2017, **9**, 28627-28634.
- 9 X. Yu, G. Chen, Y. Wang, J. Liu, K. Pei, Y. Zhao, W. You, L. Wang, J. Zhang, L. Xing, J. Ding, G. Ding, M. Wang and R. Che, Hierarchical Coupling Effect in Hollow Ni/NiFe<sub>2</sub>O<sub>4</sub>-CNTs Microsphere via Spray-Drying for Enhanced Oxygen Evolution Electrocatalysis. *Nano Res.*, 2020, **13**, 437-446.
- 10 J. Jiang, Y. J. Zhang, X. J. Zhu, S. Lu, L. L. Long and J. J. Chen, Nanostructured Metallic FeNi<sub>2</sub>S<sub>4</sub> with Reconstruction to Generate FeNi-Based Oxide as a Highly-Efficient Oxygen Evolution Electrocatalyst. *Nano Energy*, 2021, **81**, 105619.
- 11 J. H. Kim, D. H. Youn, K. Kawashima, J. Lin, H. Lim and C. B. Mullins, An Active Nanoporous Ni(Fe) OER Electrocatalyst via Selective Dissolution of Cd in Alkaline Media. *Appl. Catal. B Environ.*, 2018, **225**, 1-7.
- 12 T. Priamushko, P. Guggenberger, A. Mautner, J. Lee, R. Ryoo and F. Kleitz, Enhancing OER Activity of Ni/Co Oxides via Fe/Mn Substitution within Tailored Mesoporous Frameworks. *ACS Appl. Energy Mater.*, 2022, **5**, 13385-13397.

- 13 J. Lu, W. Hao, X. Wu, X. Shen, S. Cui and W. Shi, Electronic Modulation of the 3D Architected Ni/Fe Oxyhydroxide Anchored N-Doped Carbon Aerogel with Much Improved OER Activity. *Gels*, 2023, **9**, 190.
- 14 Y. Sun, Z. Xue, Q. Liu, Y. Jia, Y. Li, K. Liu, Y. Lin, M. Liu, G. Li and C. Y. Su, Modulating Electronic Structure of Metal-Organic Frameworks by Introducing Atomically Dispersed Ru for Efficient Hydrogen Evolution. *Nat. Commun.*, 2021, **12**, 1369.
- 15 H. Yang, L. Gong, H. Wang, C. Dong, J. Wang, K. Qi, H. Liu, X. Guo and B. Y. Xia, Preparation of Nickel-Iron Hydroxides by Microorganism Corrosion for Efficient Oxygen Evolution. *Nat. Commun.*, 2020, **11**, 5075.
- 16 Z. Zheng, L. Yu, M. Gao, X. Chen, W. Zhou, C. Ma, L. Wu, J. Zhu, X. Meng, J. Hu, Y. Tu, S. Wu, J. Mao, Z. Tian and D. Deng, Boosting Hydrogen Evolution on MoS<sub>2</sub> via Co-Confining Selenium in Surface and Cobalt in Inner Layer. *Nat. Commun.*, 2020, **11**, 3315.
- 17 T. Gao, S. Yu, Y. Chen, X. Li, X. Tang, S. Wu, B. He, H. Lan, S. Li, Q. Yue and D. Xiao, Regulating the Thickness of the Carbon Coating Layer in Iron/Carbon Heterostructures to Enhance the Catalytic Performance for Oxygen Evolution Reaction. *J. Colloid Interface Sci.*, 2023, **642**, 120-128.
